# Supplementary material for: Characterization of Amino Acid Substitution W20S in MgrB Involved in Polymyxin Resistance in Klebsiella pneumoniae
Source: PubMed Central journal article supplement (PMC8849082; doi:10.1128/spectrum.01766-21), 2022-02-16
Supplement: spectrum01766-21_supp_1_seq4.pdf [file spectrum01766-21_supp_1_seq4.pdf]

**HSP87**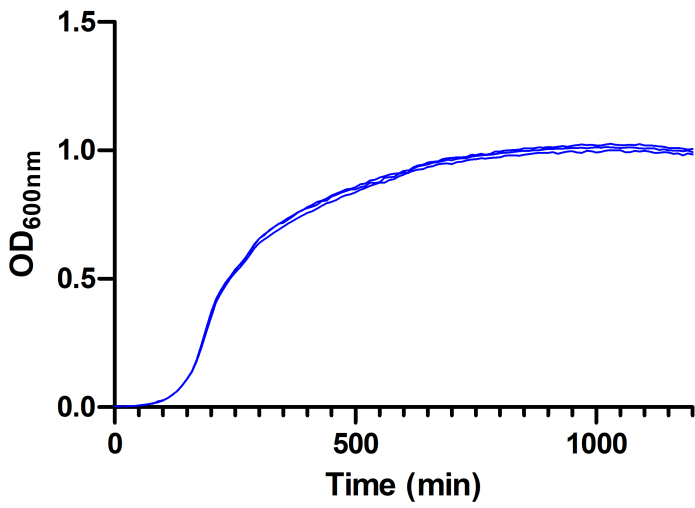**HSP12**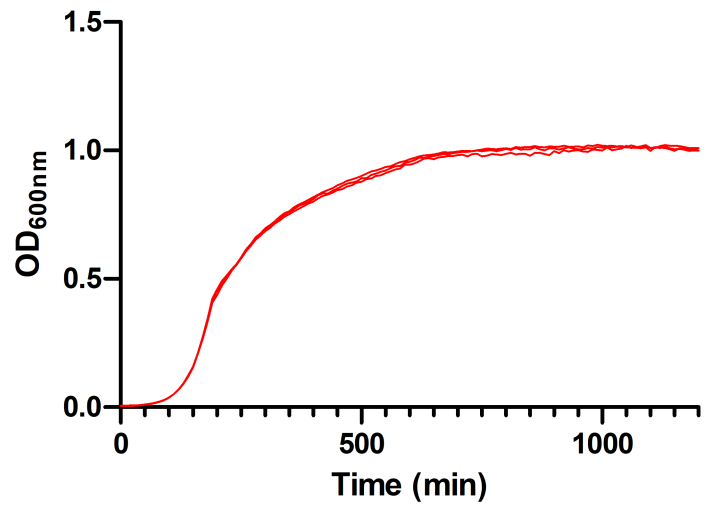**P15**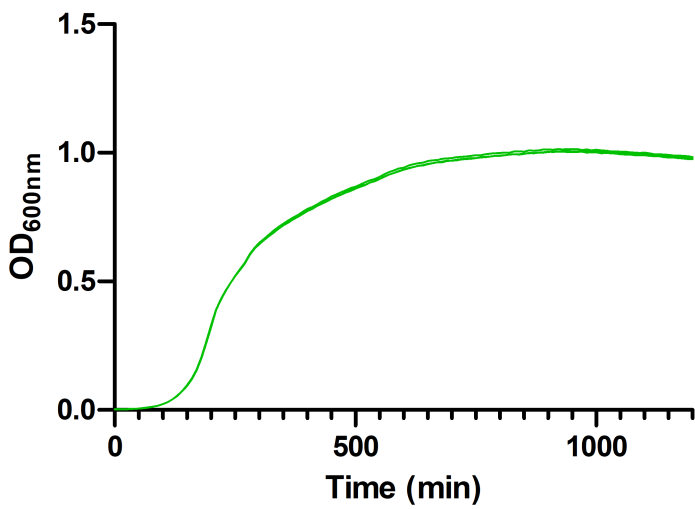**P27**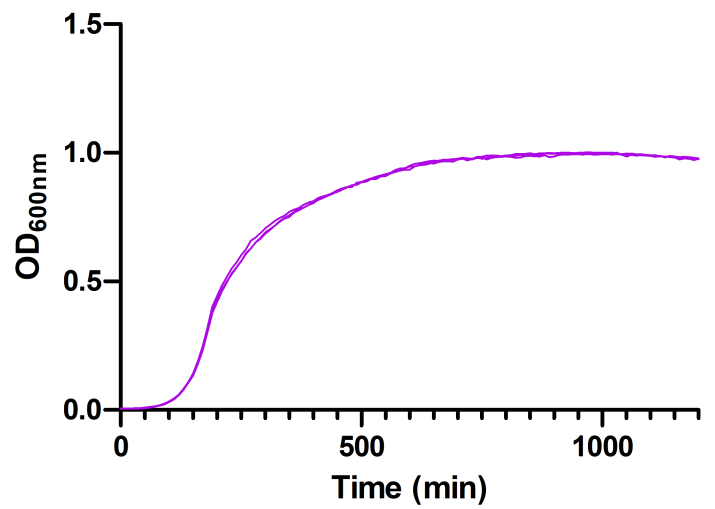**P39**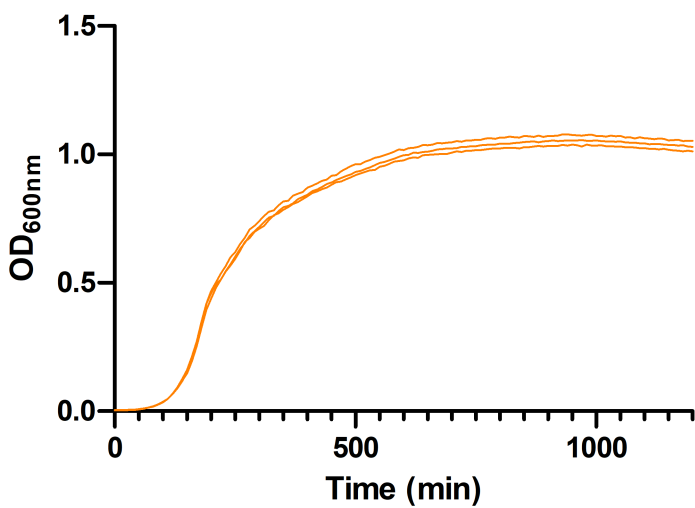**P52**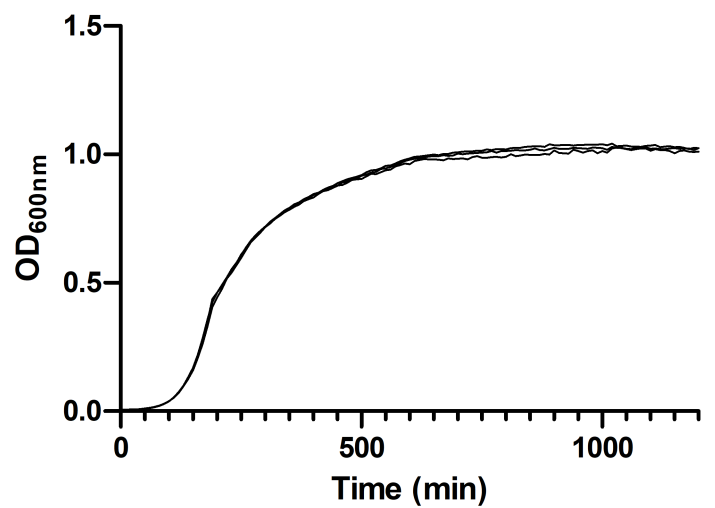

**Supplementary Figure 1:** Growth curves in triplicate of three isolates harboring the W20S mutation (HSP12, P27, P52) and three isolates with mgrB WT (HSP87, P15, P39). No difference of generation time was observed.

**Supplementary Table 1 : Characteristics of the isolates and clinical data associated**

| Strain           | Carbapenemase               | 16S-methylase | Polymyxin | Colistin | MgrB | Patient age     | Patient sex | Infection source | Treatment        | 30-day outcome |
|------------------|-----------------------------|---------------|-----------|----------|------|-----------------|-------------|------------------|------------------|----------------|
| HSP01            | <i>bla</i> <sub>KPC-2</sub> | <i>rmtB</i>   | >64       | >64      | W20S | 50              | M           | VAP              | MER              | ALIVE          |
| HSP07            | <i>bla</i> <sub>KPC-2</sub> | <i>rmtB</i>   | 16        | 16       | W20S | 53              | M           | CLABSI           | PMB+MER+RIF      | DEAD           |
| HSP08            | <i>bla</i> <sub>KPC-2</sub> | <i>rmtB</i>   | 2         | 2        | W20S | 39              | M           | CLABSI           | 1B+MER+AMK+TIG+F | DEAD           |
| HSP16            | <i>bla</i> <sub>KPC-2</sub> | <i>rmtB</i>   | 32        | 64       | W20S | MD <sup>b</sup> | MD          | MD               | MD               | DEAD           |
| HSP22            | <i>bla</i> <sub>KPC-2</sub> | <i>rmtB</i>   | 8         | 4        | W20S | 30              | M           | CLABSI           | MER+GEN          | DEAD           |
| HSP31            | <i>bla</i> <sub>KPC-2</sub> | <i>rmtB</i>   | 8         | 8        | W20S | 36              | M           | CLABSI           | PMB+MER+GEN      | DEAD           |
| HSP61            | <i>bla</i> <sub>KPC-2</sub> | <i>rmtB</i>   | 4         | 4        | W20S | 59              | F           | SSTI             | PMB+MER+AMK      | DEAD           |
| HSP78            | <i>bla</i> <sub>KPC-2</sub> | <i>rmtB</i>   | 16        | 8        | W20S | 53              | M           | CLABSI           | MER              | DEAD           |
| HSP86            | <i>bla</i> <sub>KPC-2</sub> | <i>rmtB</i>   | 2         | 2        | W20S | 32              | M           | ABDOMINAL        | PMB+MER+AMK      | ALIVE          |
| HSP87            | <i>bla</i> <sub>KPC-2</sub> | <i>rmtB</i>   | 0.5       | 0.25     | WT   | 43              | F           | UTI              | PMB+MER+ERT      | ALIVE          |
| P15              | <i>bla</i> <sub>KPC-2</sub> | <i>rmtB</i>   | 0.5       | 1        | WT   | 60              | F           | SSTI             | PMB+MER+AMK      | DEAD           |
| P27              | <i>bla</i> <sub>KPC-2</sub> | <i>rmtB</i>   | 16        | 4        | W20S | 62              | F           | CNS              | PMB+MER          | DEAD           |
| P37              | <i>bla</i> <sub>KPC-2</sub> | <i>rmtB</i>   | 4         | 8        | W20S | 57              | M           | VAP              | PMB+MER+AMK      | ALIVE          |
| P38              | <i>bla</i> <sub>KPC-2</sub> | <i>rmtB</i>   | 1         | 2        | W20S | 60              | M           | CLABSI           | PMB+GEN+MER+IMI  | DEAD           |
| P39              | <i>bla</i> <sub>KPC-2</sub> | <i>rmtB</i>   | 0.25      | 0.25     | WT   | 65              | M           | MBI-LCBI         | PMB+MER          | DEAD           |
| P43              | <i>bla</i> <sub>KPC-2</sub> | <i>rmtB</i>   | 8         | 8        | W20S | 61              | F           | CLABSI           | PMB+MER          | DEAD           |
| P46              | <i>bla</i> <sub>KPC-2</sub> | <i>rmtB</i>   | 4         | 8        | W20S | 55              | F           | CLABSI           | MER              | ALIVE          |
| P47              | <i>bla</i> <sub>KPC-2</sub> | <i>rmtB</i>   | 32        | 64       | W20S | 77              | F           | VAP              | PMB+MER+AMK      | ALIVE          |
| P48              | <i>bla</i> <sub>KPC-2</sub> | <i>rmtB</i>   | 64        | 64       | W20S | 27              | M           | CLABSI           | MER+AMK          | ALIVE          |
| P52 <sup>a</sup> | Absent                      | <i>rmtB</i>   | 8         | 16       | W20S | MD              | MD          | MD               | MD               | MD             |
| P54              | <i>bla</i> <sub>KPC-2</sub> | Absent        | 32        | 64       | W20S | 35              | M           | VAP              | PMB+MER+AMK      | DEAD           |
| P55              | <i>bla</i> <sub>KPC-2</sub> | <i>rmtB</i>   | 8         | 4        | W20S | 36              | M           | SSTI             | PMB+MER+AMK      | ALIVE          |
| P57              | <i>bla</i> <sub>KPC-2</sub> | <i>rmtB</i>   | 4         | 8        | W20S | 72              | M           | CLABSI           | CEF              | ALIVE          |
| P58              | <i>bla</i> <sub>KPC-2</sub> | <i>rmtB</i>   | 2         | 2        | W20S | 41              | F           | PNEUMONIA        | PMB+MER+AMK      | DEAD           |
| P59              | <i>bla</i> <sub>KPC-2</sub> | <i>rmtB</i>   | 32        | 64       | W20S | 71              | F           | CLABSI           | PMB+MER+AMK      | ALIVE          |
| P61              | <i>bla</i> <sub>KPC-2</sub> | <i>rmtB</i>   | 32        | 16       | W20S | 71              | F           | CLABSI           | PMB+MER+TIG      | ALIVE          |
| P68              | <i>bla</i> <sub>KPC-2</sub> | <i>rmtB</i>   | 8         | 16       | W20S | 58              | F           | CLABSI           | PMB+MER+AMK      | ALIVE          |
| P69              | <i>bla</i> <sub>KPC-2</sub> | <i>rmtB</i>   | 4         | 4        | W20S | 76              | M           | VAP              | PMB+MER+AMK      | DEAD           |
| P71              | <i>bla</i> <sub>KPC-2</sub> | <i>rmtB</i>   | 8         | 4        | W20S | 55              | F           | CNS              | MER              | DEAD           |

|     |                             |             |    |    |      |    |   |           |                 |       |
|-----|-----------------------------|-------------|----|----|------|----|---|-----------|-----------------|-------|
| P72 | <i>bla</i> <sub>KPC-2</sub> | <i>rmtB</i> | 4  | 8  | W20S | 63 | F | VAP       | PMB+MER+GEN     | DEAD  |
| P73 | <i>bla</i> <sub>KPC-2</sub> | <i>rmtB</i> | 16 | 32 | W20S | 67 | M | CLABSI    | PMB+MER         | ALIVE |
| P74 | <i>bla</i> <sub>KPC-2</sub> | <i>rmtB</i> | 4  | 4  | W20S | 85 | M | SSTI      | PMB+MER+AMK     | DEAD  |
| P75 | <i>bla</i> <sub>KPC-2</sub> | <i>rmtB</i> | 4  | 4  | W20S | 78 | F | CLABSI    | MER+GEN         | ALIVE |
| P76 | <i>bla</i> <sub>KPC-2</sub> | <i>rmtB</i> | 4  | 8  | W20S | 73 | M | CLABSI    | PMB+MER+AMK     | ALIVE |
| P78 | <i>bla</i> <sub>KPC-2</sub> | <i>rmtB</i> | 8  | 8  | W20S | 54 | M | CLABSI    | PMB+MER+AMK     | DEAD  |
| P79 | <i>bla</i> <sub>KPC-2</sub> | <i>rmtB</i> | 8  | 16 | W20S | 84 | M | VAP       | MER+ERT+TIG     | DEAD  |
| P80 | <i>bla</i> <sub>KPC-2</sub> | <i>rmtB</i> | 2  | 4  | W20S | 70 | M | VAP       | CAZ-AVI         | DEAD  |
| P83 | <i>bla</i> <sub>KPC-2</sub> | <i>rmtB</i> | 4  | 4  | W20S | 71 | M | VAP       | PMB+MER+AMK     | DEAD  |
| P86 | <i>bla</i> <sub>KPC-2</sub> | <i>rmtB</i> | 8  | 16 | W20S | 42 | F | VAP       | PMB+MER+AMK     | ALIVE |
| P87 | <i>bla</i> <sub>KPC-2</sub> | <i>rmtB</i> | 8  | 16 | W20S | 74 | M | ABDOMINAL | PMB+MER         | DEAD  |
| P88 | <i>bla</i> <sub>KPC-2</sub> | <i>rmtB</i> | 2  | 2  | W20S | 57 | M | SSTI      | PMB+MER+AMK+TIG | DEAD  |
| P89 | <i>bla</i> <sub>KPC-2</sub> | <i>rmtB</i> | 4  | 4  | W20S | 83 | F | ABDOMINAL | PMB+MER+ERT+TIG | DEAD  |
| P90 | <i>bla</i> <sub>KPC-2</sub> | <i>rmtB</i> | 8  | 8  | W20S | 64 | F | CLABSI    | MD              | ALIVE |

PMB, polymyxin B; MER, meropenem; ERT, ertapenem; IMI, imipenem; CEF, ceftriaxone; CAZ-AVI, ceftazidime-avibactam; AMK, amikacin; GEN, gentamicin; TIG, tigecycline; FOS, fosfomycin

VAP, ventilator-associated pneumonia; CLABSI, central-line associated bloodstream infection; SSTI, skin and soft tissue infection;

UTI, urinary tract infection; CNS, central nervous system; MBI-LCBI, mucosal barrier injury laboratory-confirmed bloodstream infection

<sup>a</sup> Clinical data were not available for the non-carbapenemase producing strain P52

<sup>b</sup> MD, missing data
